# Supplementary material for: Comparative Characterization of Fruit Volatiles and Volatile-Related Genes Expression of ‘Benihoppe’ Strawberry and Its Somaclonal Mutant
Source: MDPI journal article supplement (doi:10.3390/plants12051109), 2023-03-01
Supplement: s1 [file s1]

## Supplementary materials

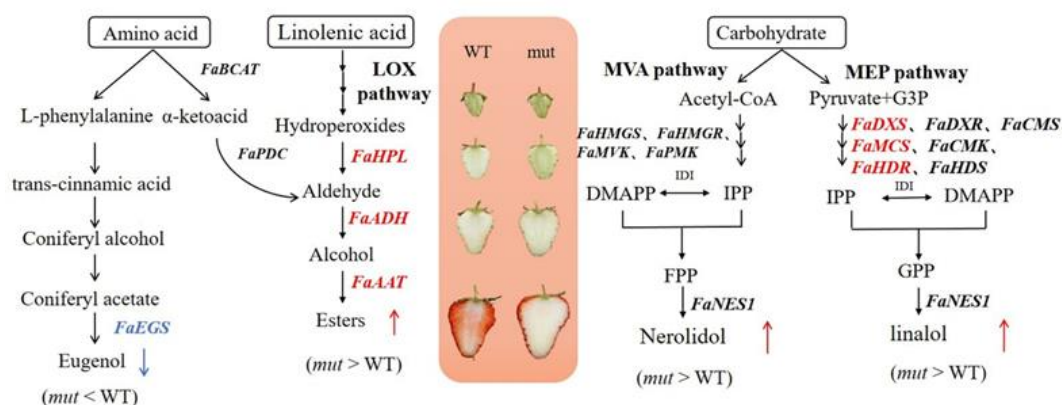

**Figure S1.** Overview of differential volatile compounds and possible key genes responsible for the differential volatile compounds between 'Benihoppe' and 'Xiaobai'. The blue arrow represents decreased volatile compounds in the red fruit stage of 'Xiaobai' compared with 'Benihoppe' and the blue font represents the gene may result in decreased volatile compounds in the red fruit stage of 'Xiaobai'. The red arrow represents increased volatile compounds in the red fruit stage of 'Xiaobai' compared with 'Benihoppe' and the red font represents the genes may result in increased volatile compounds in the red fruit stage of 'Xiaobai'.

**Table S1.** Primers used for gene expression analysis.

| Primer Names               | Primer Sequence (5'-3') |
|----------------------------|-------------------------|
| <i>FaACX1</i> -qPCR-F      | CAAACAAGGTTCACTCGCCA    |
| <i>FaACX1</i> -qPCR-R      | CGCCTCCTCGTAAAGTTTCG    |
| <i>FaACX2</i> -qPCR-F      | ACTGCTCGATGGGAAAGTGA    |
| <i>FaACX2</i> -qPCR-R      | CAGCTCGAGAACTTGCATCC    |
| <i>FaACX4</i> -qPCR-F      | GCAACAAAGGTGGAAGGAGG    |
| <i>FaACX4</i> -qPCR-R      | TCCATTTTGAACCATGCGCA    |
| <i>FaFAD2</i> -qPCR-F      | GTCCCTTGTTGGTGGTGAAC    |
| <i>FaFAD2</i> -qPCR-R      | AAGGCTCCTCTCAACCAGTC    |
| <i>FaFAE4</i> -LIKE-qPCR-F | AATGGGGTGTAGTGCTGGAG    |
| <i>FaFAE4</i> -LIKE-qPCR-R | CGACGCCTATCCAATGACTT    |
| <i>FaFAH1</i> -qPCR-F      | GCCCCACTTTTATTGCCACA    |
| <i>FaFAH1</i> -qPCR-R      | CGACTCACCTCACCTCTTT     |
| <i>FaPXG</i> -qPCR-F       | CTTTGGCAACATCAGCAAAA    |
| <i>FaPXG</i> -qPCR-R       | CAAGAGCTCGACATCCAACA    |
| <i>FaPXG4</i> -qPCR-F      | TTTCATCAAGCATGCACACA    |
| <i>FaPXG4</i> -qPCR-R      | GCTCCCATCGTAGACAGCTC    |
| <i>FaCYP1</i> -qPCR-F      | TAGGGTAGTGGGAGTCGACA    |
| <i>FaCYP1</i> -qPCR-R      | GCTCCACTTGTTGACATGCA    |
| <i>FaEH2</i> -LIKE-qPCR-F  | GTGCTTTTCTGTCATGGATT    |
| <i>FaEH2</i> -LIKE-qPCR-R  | CCAAAAGGCCAACAACATCT    |
| <i>FvLOX1</i> -qPCR-F      | GGGAGTCCAGACAAAGGTGA    |
| <i>FvLOX1</i> -qPCR-R      | TTCAAGTTTGCGGCTCTTCC    |
| <i>FvLOX2</i> -qPCR-F      | AGAGTGTGCTGACTATCCCG    |
| <i>FvLOX2</i> -qPCR-R      | GGAATCCGGTGAGCTCGATA    |
| <i>FaLOX3</i> -qPCR-F      | TTGGGAGGCTAAAGGGAGTG    |
| <i>FaLOX3</i> -qPCR-R      | AAATTCGTCATCTCGCAGCC    |
| <i>FaLOX5</i> -qPCR-F      | GAAGAGCTCCGCAATGAAGG    |
| <i>FaLOX5</i> -qPCR-R      | GGCCACATCAGGGTTAGTCT    |
| <i>FaLOX6</i> -qPCR-F      | GAAGTAGCTAGGCCGGTTCAT   |

---

|                         |                      |
|-------------------------|----------------------|
| <i>FaLOX6-qPCR-R</i>    | GCAAGGCTTTCAACTTCCCA |
| <i>FaHPL-qPCR-F</i>     | AACGCATTTGGTGGTTTCTC |
| <i>FaHPL-qPCR-R</i>     | GTTGAGCCGGAGTGTTCAT  |
| <i>FaADH-qPCR-F</i>     | GAACCCCAAAGACCACAAGA |
| <i>FaADH-qPCR-R</i>     | AAGAACAGCAACACCCCAAC |
| <i>FaAAT1-qPCR-F</i>    | GCAATCGGTGTCTTCGTCTC |
| <i>FaAAT1-qPCR-R</i>    | ATCTCTCGGTGGGAAAAGCA |
| <i>FaAAT2-qPCR-F</i>    | GGCTCTGATGGCATTCTTGG |
| <i>FaAAT2-qPCR-R</i>    | GGACCGTTGCACCATAGTTC |
| <i>FaAAT-qPCR-F</i>     | TGCTTTTCCCACCGAGAGAT |
| <i>FaAAT-qPCR-R</i>     | AAACCAGTGACGGCATGAAC |
| <i>FaPDC-qPCR-F</i>     | CACCTCCACCGTTCAAACT  |
| <i>FaPDC-qPCR-R</i>     | GAGGTGGTCAAGAAGGGTCA |
| <i>FaPDC1-qPCR-F</i>    | TGCCTTTTGTGCTGAGATTG |
| <i>FaPDC1-qPCR-R</i>    | TTGCTAGGCCTACGAGGAAA |
| <i>FaBCAT2-qPCR-F</i>   | CAACGGCCGGGACTATACTA |
| <i>FaBCAT2-qPCR-R</i>   | AACAGTTTGGGCACCTGTTC |
| <i>FaPAL1-qPCR-F</i>    | GCTGAGCAACACAACCAAGA |
| <i>FaPAL1-qPCR-R</i>    | GTCTCTCTGGCCACTTTACT |
| <i>FaPAL2-qPCR-F</i>    | AGTCTCACACTCTGCCTCAC |
| <i>FaPAL2-qPCR-R</i>    | AGGCAAGCAGGGAGTAATGT |
| <i>FaEGS1a-qPCR-F</i>   | GGTTGAGCCGGCTAAATCTG |
| <i>FaEGS1a-qPCR-R</i>   | TGTAGGTGCCAATGTCGTCT |
| <i>FaEGS2-qPCR-F</i>    | GCAGAGAAGTTGAGGCATCG |
| <i>FaEGS2-qPCR-R</i>    | TTAAGGTTCTCGGGTCGTCC |
| <i>FaDXS-qPCR-F</i>     | CACAAAGACCACCCCTCCT  |
| <i>FaDXS-qPCR-R</i>     | ACAACACCAAGGCTTGATCC |
| <i>FaDXR-qPCR-F</i>     | AGCAAATGAAAAGGCTGTGG |
| <i>FaDXR-qPCR-R</i>     | CGTGCCCACAAATCATAGTG |
| <i>FaMCS-qPCR-F</i>     | CCCAGAACCAAACCCCTACT |
| <i>FaMCS-qPCR-R</i>     | CCACCACACAATGAAGCAAC |
| <i>FaCMS-qPCR-F</i>     | GCAGCTGTACTAGGCGTTCC |
| <i>FaCMS-qPCR-R</i>     | ACAGGATGTGGAAGGTGCTC |
| <i>FaCMK-qPCR-F</i>     | AAGTGCCTACAGGAGCAGGA |
| <i>FaCMK-qPCR-R</i>     | CAAAGGGTACAGGTGGAGGA |
| <i>FaHDS-qPCR-F</i>     | GATAGACGCGCACAGTTTGA |
| <i>FaHDS-qPCR-R</i>     | CTCGCAAATTCAAATGCAGA |
| <i>FaHDR-qPCR-F</i>     | GGTGTTCCGGAAGAATCTCA |
| <i>FaHDR-qPCR-R</i>     | TCTGGCCTCGTAAGCAATCT |
| <i>FaHMG-CoA-qPCR-F</i> | TGGTTCAACTGCAACCATGT |
| <i>FaHMG-CoA-qPCR-R</i> | CCTCCATACCTGTGCTCCAT |
| <i>FaHMGR2-qPCR-R</i>   | ATAGCCCACTGGCATTTCAC |
| <i>FaHMGR2-qPCR-R</i>   | ATAGCCCACTGGCATTTCAC |
| <i>FaMVK-qPCR-F</i>     | GGAAGTCAAAGCCAGAGCAC |
| <i>FaMVK-qPCR-R</i>     | GTTGATGGGTTGGGAACATC |
| <i>FaPMK-qPCR-F</i>     | CCGAGGAATCAAATGGAGAA |
| <i>FaPMK-qPCR-R</i>     | CAAAACCACTGCCCACTTTT |
| <i>FaCCD1-qPCR-F</i>    | ATGCTTGGGAGGAAGAGGAC |
| <i>FaCCD1-qPCR-R</i>    | TCTGTGTTGCTAGACCGGTT |
| <i>FaCCD4-qPCR-F</i>    | GCAGGATGTACGGTGAGGAT |
| <i>FaCCD4-qPCR-R</i>    | GATGTCCAGCTCAGACGACA |
| <i>FaNES1-qPCR-F</i>    | AGTATTGTGTCTGCCCGTGA |
| <i>FaNES1-qPCR-R</i>    | CCTTCTGTACCTAGCTGCGA |

---

**Table S2.** Relative contents of volatile components in four developmental stages of ‘Benihoppe’ (WT).

| Aroma components         | RI   | Classification | WT -Green             | WT -White         | WT -Turn          | WT -Red           |
|--------------------------|------|----------------|-----------------------|-------------------|-------------------|-------------------|
| Methoxypropanol          | 1131 | Alcohols       | 0.00390±0.00155<br>ab | 0.00020±0.00029c  | —                 | —                 |
| Pentyl alcohol           | 1256 | Alcohols       | 0.00200±0.00047<br>c  | 0.00310±0.00037c  | 0.00830±0.00125a  | 0.00890±0.00012a  |
| 2-Heptanol               | 1327 | Alcohols       | 0.00680±0.00066<br>c  | 0.00380±0.00073cd | 0.00620±0.00026cd | 0.01910±0.00050b  |
| cis-2-Pentenol           | 1309 | Alcohols       | 0.00810±0.00041<br>a  | 0.00350±0.00016c  | 0.00500±0.00042b  | 0.00390±0.00004c  |
| Hexanol                  | 1356 | Alcohols       | 0.09440±0.00200<br>a  | 0.00800±0.00126g  | 0.01340±0.00104de | 0.03720±0.00168b  |
| cis-3-Hexenol            | 1371 | Alcohols       | 0.01590±0.00034<br>a  | 0.00100±0.00008e  | 0.00100±0.00007e  | 0.00110±0.00011e  |
| trans-2-Hexenol          | 1324 | Alcohols       | 0.00260±0.00038<br>b  | 0.00200±0.00033b  | 0.00290±0.00044b  | 0.00670±0.00016b  |
| cis-2-Hexenol            | 1398 | Alcohols       | 0.05490±0.00113<br>a  | 0.00550±0.00246de | 0.00790±0.00070cd | 0.01910±0.00075b  |
| 1-Heptanol               | 1460 | Alcohols       | 0.00160±0.00008<br>b  | 0.00070±0.0001e   | 0.00170±0.00003b  | 0.00280±0.00005a  |
| 2-Ethyl-1-hexanol        | 1489 | Alcohols       | 0.01260±0.00032<br>a  | 0.01140±0.0007a   | 0.00910±0.00038b  | 0.00880±0.00032b  |
| 3-Ethyl-4-methylpentanol | 1500 | Alcohols       | 0.00030±0.00002<br>b  | 0.00010±0.00001b  | 0.00030±0.00003b  | 0.00030±0.00003b  |
| 1-Octanol                | 1557 | Alcohols       | 0.00210±0.00003<br>e  | 0.00220±0.00023de | 0.00450±0.00026c  | 0.00790±0.00029bc |
| trans-2-Octenol          | 1616 | Alcohols       | 0.00100±0.00006<br>e  | 0.00120±0.00008de | 0.00220±0.00005c  | 0.00230±0.00023bc |
| Nonanol                  | 1654 | Alcohols       | 0.00070±0.00005<br>b  | 0.00080±0.00014b  | 0.00070±0.00006b  | 0.00110±0.00013a  |
| 1-Dodecanol              | 1404 | Alcohols       | 0.00020±0.00004<br>c  | 0.00010±0.00004c  | 0.00060±0.00037ab | 0.00030±0.00008bc |
| 2-methyl-5-Hepten-1-ol   | 1730 | Alcohols       | —                     | —                 | —                 | 0.00050±0.00002b  |
| Acetic acid              | 1449 | Acid           | 0.00160±0.00029<br>b  | 0.00080±0.00011b  | 0.00130±0.00027b  | 0.00360±0.00039b  |
| Isobutyric acid          | 1557 | Acid           | 0.00030±0.00003<br>cd | 0.00020±0.00002de | 0.00030±0.00001cd | 0.00290±0.00019b  |
| Butanoic acid            | 1574 | Acid           | 0.00020±0.00008<br>c  | 0.00010±0.00001c  | 0.00070±0.00008c  | 0.02650±0.00249b  |
| Methylethylacetic acid   | 1658 | Acid           | 0.00060±0.00041<br>c  | 0.00010±0.00003c  | 0.00380±0.00006c  | 0.08650±0.00634a  |
| Hexanoic acid            | 1762 | Acid           | 0.01700±0.00897<br>d  | 0.00290±0.00076d  | 0.05340±0.00323cd | 1.10860±0.07603b  |
| trans-3-Hexenoic Acid    | 1909 | Acid           | —                     | —                 | —                 | 0.00050±0.00008b  |
| Heptylic acid            | 1947 | Acid           | 0.00020±0.00002<br>c  | 0.00010±0.00002c  | 0.00030±0.00001c  | 0.00200±0.00022b  |
| trans-2-Hexenoic acid    | 1933 | Acid           | 0.00180±0.00020<br>bc | 0.00070±0.00011c  | 0.00140±0.00024c  | 0.00290±0.00024b  |
| Octanoic acid            | 2052 | Acid           | 0.00210±0.00112<br>c  | 0.00050±0.00011c  | 0.00320±0.00019c  | 0.11210±0.01241b  |
| Nonanoic acid            | 2155 | Acid           | 0.00070±0.00005<br>b  | 0.00040±0.00006b  | 0.00030±0.00005b  | 0.00100±0.00014b  |
| trans-2-Octenoic acid    | 2182 | Acid           | —                     | —                 | —                 | —                 |
| Ethyl butyrate           | 1039 | Ethyl esters   | 0.00150±0.00047<br>b  | 0.00090±0.00042b  | 0.00360±0.00060b  | 0.12780±0.00642b  |
| Ethyl 2-methylbutyrate   | 1062 | Ethyl esters   | —                     | —                 | —                 | 0.00090±0.00007b  |
| Ethyl isovalerate        | 1093 | Ethyl esters   | —                     | —                 | —                 | 0.00740±0.00035b  |
| Ethyl pentanoate         | 1140 | Ethyl esters   | —                     | —                 | —                 | 0.00150±0.00002b  |

|                          |      |                                     |                       |                    |                   |                   |
|--------------------------|------|-------------------------------------|-----------------------|--------------------|-------------------|-------------------|
| Ethyl hexanoate          | 899  | <i>Ethyl esters</i>                 | 0.00210±0.00138<br>b  | 0.00060±0.00015b   | 0.00180±0.00052b  | 0.06790±0.00463b  |
| Ethyl 2-hexenoate        | 1343 | <i>Ethyl esters</i>                 | —                     | —                  | —                 | —                 |
| Ethyl 3-hydroxyhexanoate | 1677 | <i>Ethyl esters</i>                 | —                     | —                  | —                 | —                 |
| Methyl acetate           | 848  | <i>acetate esters</i>               | 0.00650±0.00026f      | 0.00720±0.00079f   | 0.14610±0.01222d  | 0.33920±0.00789a  |
| Ethyl Acetate            | 764  | <i>acetate esters</i>               | 0.00790±0.00076<br>b  | 0.00760±0.0007b    | 0.01330±0.00139b  | 0.02590±0.00071b  |
| Isopentyl acetate        | 1136 | <i>acetate esters</i>               | —                     | —                  | 0.00820±0.00080c  | 0.03110±0.00203b  |
| isopentenyl acetate      | 1249 | <i>acetate esters</i>               | —                     | —                  | —                 | 0.00350±0.00007b  |
| 2-Heptyl acetate         | 1380 | <i>acetate esters</i>               | —                     | —                  | —                 | 0.00110±0.00014b  |
| Hexyl acetate            | 1299 | <i>acetate esters</i>               | 0.00040±0.00012<br>d  | 0.00040±0.00006d   | 0.00970±0.00227cd | 0.06900±0.00463b  |
| trans-3-Hexenyl acetate  | 1306 | <i>acetate esters</i>               | —                     | 0.00040±0.00004c   | 0.00050±0.00007c  | 0.00300±0.00013a  |
| trans-2-Hexenyl acetate  | 1337 | <i>acetate esters</i>               | 0.00030±0.00007<br>e  | 0.00030±0.00005e   | 0.01040±0.00173d  | 0.10870±0.00485a  |
| Methyl butyrate          | 945  | <i>other esters</i>                 | —                     | —                  | 0.01760±0.00229d  | 0.45720±0.01131a  |
| Methyl isopentanoate     | 1019 | <i>other esters</i>                 | —                     | —                  | 0.00180±0.00028d  | 0.03310±0.00151b  |
| Propyl isovalerate       | 1167 | <i>other esters</i>                 | —                     | —                  | —                 | —                 |
| Methyl hexanoate         | 1197 | <i>other esters</i>                 | 0.00120±0.00070<br>d  | 0.00040±0.00004d   | 0.00330±0.00109d  | 0.36510±0.01481b  |
| Butyl butylate           | 1240 | <i>other esters</i>                 | —                     | —                  | —                 | 0.00500±0.00095b  |
| Isoamyl butylate         | 1263 | <i>other esters</i>                 | —                     | —                  | —                 | 0.00410±0.00040b  |
| Methyl 2-hexenoate       | 1272 | <i>other esters</i>                 | 0.00090±0.00013<br>cd | 0.00080±0.0001cd   | 0.00150±0.00016c  | 0.00490±0.00025b  |
| Hexyl butyrate           | 1417 | <i>other esters</i>                 | 0.00050±0.00012<br>b  | 0.00030±0.00004b   | 0.00060±0.00007b  | 0.00050±0.00012b  |
| trans-2-Hexenyl Butyrate | 1476 | <i>other esters</i>                 | —                     | —                  | 0.00030±0.00002c  | 0.00120±0.00008b  |
| Octyl isovalerate        | 1654 | <i>other esters</i>                 | —                     | —                  | —                 | —                 |
| p-Xylene                 | 870  | <i>Benzene and volatile phenols</i> | 0.00760±0.00042<br>cd | 0.00420±0.00080de  | 0.01230±0.00289b  | 0.01870±0.00178a  |
| Styrene                  | 1264 | <i>Benzene and volatile phenols</i> | 0.00080±0.00005<br>bc | 0.00050±0.00009c   | 0.00080±0.00007bc | 0.00180±0.00098b  |
| Benzaldehyde             | 1523 | <i>Benzene and volatile phenols</i> | 0.00310±0.00066<br>c  | 0.00180±0.00018c   | 0.00580±0.00074c  | 0.01390±0.00065b  |
| Clorius                  | 1590 | <i>Benzene and volatile phenols</i> | —                     | —                  | 0.00040±0.00001c  | 0.00070±0.00002b  |
| Benzeneacetaldehyde      | 1574 | <i>Benzene and volatile phenols</i> | 0.00340±0.00028<br>b  | 0.00040±0.00005c   | —                 | —                 |
| Acetophenon              | 1652 | <i>Benzene and volatile phenols</i> | 0.00080±0.00005<br>b  | 0.00060±0.00006bc  | 0.00030±0.00002d  | 0.00050±0.00004cd |
| Ethyl benzoate           | 1671 | <i>Benzene and volatile phenols</i> | —                     | —                  | —                 | —                 |
| Benzyl acetate           | 1727 | <i>Benzene and volatile phenols</i> | —                     | —                  | 0.00030±0.00001cd | 0.00140±0.00005b  |
| Naphthalene              | 1744 | <i>Benzene and volatile phenols</i> | 0.00630±0.00020<br>b  | 0.00370±0.00039cde | 0.00320±0.00031de | 0.00540±0.00062bc |
| Methyl salicylate        | 1675 | <i>Benzene and volatile phenols</i> | 0.00130±0.00022<br>d  | 0.00030±0.00005e   | 0.00060±0.00001e  | 0.00360±0.00019b  |

|                             |      |                                     |                       |                   |                   |                   |
|-----------------------------|------|-------------------------------------|-----------------------|-------------------|-------------------|-------------------|
| 2-Methylnaphthalene         | 1839 | <i>Benzene and volatile phenols</i> | 0.00200±0.00007<br>b  | 0.00110±0.00011cd | 0.00100±0.0001cd  | 0.00160±0.00025bc |
| Benzyl alcohol              | 1883 | <i>Benzene and volatile phenols</i> | 0.00180±0.00016<br>a  | 0.00030±0.00002d  | 0.00100±0.00008bc | 0.00190±0.00014a  |
| Phenylethyl Alcohol         | 1920 | <i>Benzene and volatile phenols</i> | 0.00130±0.00013<br>a  | 0.00020±0.00002d  | 0.00040±0.00004cd | 0.00100±0.00011b  |
| Benzenol                    | 2012 | <i>Benzene and volatile phenols</i> | 0.00030±0.00003<br>c  | 0.00020±0.00001d  | 0.00030±0.00001c  | 0.00040±0.00001b  |
| Ethyl cinnamate             | 2145 | <i>Benzene and volatile phenols</i> | 0.00070±0.00025<br>b  | 0.00020±0.00006b  | 0.00030±0.00008b  | 0.00300±0.00026b  |
| Cinnamyl acetate            | 2192 | <i>Benzene and volatile phenols</i> | —                     | —                 | —                 | —                 |
| Eugenol                     | 2160 | <i>Benzene and volatile phenols</i> | —                     | —                 | —                 | 0.00050±0.00003a  |
| Pentanal                    | 982  | <i>aldehydes and ketone</i>         | 0.00410±0.00015<br>e  | 0.00420±0.00050e  | 0.01530±0.00173c  | 0.03050±0.00085b  |
| Ethyl vinyl ketone          | 1410 | <i>aldehydes and ketone</i>         | 0.00480±0.00021<br>e  | 0.01060±0.00122e  | 0.08180±0.00825a  | 0.04820±0.00186c  |
| Hexanal                     | 1041 | <i>aldehydes and ketone</i>         | 0.55010±0.09598<br>bc | 0.35450±0.05897d  | 0.74080±0.03536a  | 0.62290±0.03214ab |
| trans-2-Pentenal            | 1173 | <i>aldehydes and ketone</i>         | 0.01130±0.00252<br>de | 0.00920±0.00028e  | 0.02320±0.00174b  | 0.01710±0.00184c  |
| 3-Hexenal                   | 853  | <i>aldehydes and ketone</i>         | 0.02410±0.00301<br>bc | 0.01320±0.00240ef | 0.02810±0.00295ab | 0.01670±0.00214de |
| Isobutyl ketone             | 1207 | <i>aldehydes and ketone</i>         | 0.00590±0.00020<br>ab | 0.00470±0.00072bc | 0.00450±0.00082bc | 0.00640±0.00083a  |
| Heptanal                    | 1187 | <i>aldehydes and ketone</i>         | 0.00360±0.00029<br>cd | 0.00250±0.00039d  | 0.00520±0.00026c  | 0.01430±0.00151b  |
| trans-2-Hexenal             | 1329 | <i>aldehydes and ketone</i>         | 0.03680±0.00097<br>a  | 0.01600±0.00230de | 0.02810±0.00218b  | 0.01690±0.00081d  |
| 2-Hexenal                   | 1220 | <i>aldehydes and ketone</i>         | 1.51500±0.03934<br>a  | 0.74210±0.088970e | 1.21590±0.05420b  | 0.89540±0.03303cd |
| 3-Octanone                  | 1281 | <i>aldehydes and ketone</i>         | 0.00070±0.00004<br>cd | 0.00060±0.00011cd | 0.00200±0.00055c  | 0.00750±0.00027b  |
| Octanal                     | 1280 | <i>aldehydes and ketone</i>         | 0.00110±0.00014<br>c  | 0.00110±0.00014c  | 0.00180±0.00009c  | 0.00430±0.00021b  |
| 1-Octene-3-one              | 1438 | <i>aldehydes and ketone</i>         | 0.00080±0.00001<br>d  | 0.00120±0.00024d  | 0.00550±0.00077b  | 0.00400±0.00018c  |
| cis-2-Heptenal              | 1323 | <i>aldehydes and ketone</i>         | 0.00380±0.00016<br>d  | 0.00500±0.00066d  | 0.01360±0.00111b  | 0.01190±0.00018bc |
| Sulcatone                   | 1333 | <i>aldehydes and ketone</i>         | 0.00160±0.00006<br>e  | 0.00140±0.00010e  | 0.00370±0.00048c  | 0.00530±0.00013b  |
| Nonanal                     | 1386 | <i>aldehydes and ketone</i>         | 0.00050±0.00006<br>c  | 0.00040±0.00008cd | 0.00050±0.00008c  | 0.00090±0.00007b  |
| Sorbaldehyde                | 1411 | <i>aldehydes and ketone</i>         | 0.01470±0.00064<br>a  | 0.00690±0.00088de | 0.01070±0.00026c  | 0.00740±0.00007d  |
| trans-2-Octenal             | 1428 | <i>aldehydes and ketone</i>         | 0.00100±0.00013<br>d  | 0.00160±0.00022d  | 0.00910±0.00045b  | 0.00920±0.00012b  |
| trans-2-trans-4-Heptadienal | 1494 | <i>aldehydes and ketone</i>         | 0.01080±0.00018<br>c  | 0.00620±0.00053f  | 0.01330±0.00121b  | 0.00760±0.00022e  |
| Decanal                     | 1504 | <i>aldehydes and ketone</i>         | 0.00050±0.00010<br>c  | 0.00040±0.00013c  | 0.00030±0.00008c  | 0.00100±0.00025b  |

|                             |      |                      |                   |                   |                   |                   |
|-----------------------------|------|----------------------|-------------------|-------------------|-------------------|-------------------|
| Camphor                     | 1516 | aldehydes and ketone | 0.00120±0.00002a  | 0.00040±0.00003f  | 0.00090±0.00003c  | 0.00060±0.00002e  |
| trans-2-Nonenal             | 1679 | aldehydes and ketone | 0.00050±0.00003de | 0.00040±0.00007de | 0.00120±0.00020cd | 0.00240±0.00006b  |
| Cucumber aldehyde           | 1589 | aldehydes and ketone | 0.00120±0.00009d  | 0.00080±0.00007de | 0.00270±0.00031c  | 0.00250±0.00012c  |
| trans-2-Decenal             | 1206 | aldehydes and ketone | 0.00040±0.00005cd | 0.00030±0.00010cd | 0.00040±0.00007cd | 0.00080±0.00006b  |
| trans, trans-2,4-Nonadienal | 1703 | aldehydes and ketone | 0.00060±0.00002cd | 0.00050±0.00003de | 0.00150±0.00055b  | 0.00160±0.00012b  |
| 1-Pentene-3-ol              | 1162 | Isoprenoids          | 0.01170±0.00155a  | 0.00690±0.00066cd | 0.01010±0.00115ab | 0.00840±0.00039bc |
| β-Myrcene                   | 1170 | Isoprenoids          | —                 | —                 | —                 | —                 |
| D-Limonene                  | 1203 | Isoprenoids          | —                 | —                 | 0.00050±0.00007c  | 0.00250±0.00020b  |
| β-Ocimene                   | 1246 | Isoprenoids          | —                 | —                 | 0.00030±0.00004c  | 0.00200±0.00014b  |
| Dihydrolinalool             | 1255 | Isoprenoids          | 0.00250±0.00020b  | 0.00160±0.00024cd | 0.00080±0.00027e  | 0.00190±0.00013bc |
| cis-Linalool oxide          | 1441 | Isoprenoids          | 0.00010±0.00005f  | 0.00010±0.00000f  | 0.00090±0.00007b  | 0.00070±0.00004c  |
| Morillool                   | 1452 | Isoprenoids          | 0.01440±0.00021e  | 0.01940±0.00204d  | 0.03260±0.00139c  | 0.03700±0.00132b  |
| trans-Linalool oxide        | 1464 | Isoprenoids          | 0.00020±0.00003e  | 0.00020±0.00001e  | 0.00210±0.00029b  | 0.00180±0.00009bc |
| Linalol                     | 1527 | Isoprenoids          | 0.00150±0.00009e  | 0.00130±0.00005e  | 0.02070±0.00154d  | 0.14690±0.00638b  |
| Levomenthol                 | 1651 | Isoprenoids          | 0.00120±0.00016b  | 0.00080±0.00006cd | 0.00070±0.00010d  | 0.00110±0.00013bc |
| Farnesene                   | 1749 | Isoprenoids          | 0.00040±0.00009b  | —                 | —                 | 0.00050±0.00002b  |
| α-Terpineol                 | 1697 | Isoprenoids          | 0.00030±0.00004c  | 0.00020±0.00001c  | 0.00080±0.00031c  | 0.00330±0.00046b  |
| Bisabolene                  | 1792 | Isoprenoids          | —                 | —                 | —                 | —                 |
| Nerylacetone                | 1865 | Isoprenoids          | —                 | 0.00010±0.00001bc | 0.00040±0.00003bc | —                 |
| Bisabolol                   | 2207 | Isoprenoids          | —                 | —                 | —                 | —                 |
| β-Damascenone               | 1808 | Isoprenoids          | 0.00510±0.00071a  | 0.00410±0.00014ab | 0.00390±0.00401ab | 0.00370±0.00061ab |
| Nerolidol                   | 1961 | Isoprenoids          | —                 | —                 | —                 | 0.00620±0.00014b  |
| 1-p-Menthen-9-al            | 1212 | Isoprenoids          | 0.00040±0.00002de | 0.00010±0.00004e  | 0.00060±0.00021d  | 0.00190±0.0002b   |
| 2-Pentylfuran               | 1231 | furan                | 0.00550±0.00011bc | 0.00410±0.00053bc | 0.00890±0.00552b  | 0.01070±0.00095b  |
| Furfural                    | 1472 | furan                | 0.00200±0.00003a  | 0.00170±0.00016b  | 0.0002±0.00007e   | 0.0002±0.00002e   |

Note: different letters represent comparison of the same volatile components in four periods of ‘Benihoppe’ (WT, Table S2) and somaclonal mutant ‘Xiaobai’ (*mut*, Table S3)

**Table S3.** Relative contents of volatile components in four developmental stages of somaclonal mutant ‘Xiaobai’(*mut*).

| Aroma components | RI   | Classification | <i>mut</i> - Green | <i>mut</i> - White | <i>mut</i> - Turn | <i>mut</i> - Red  |
|------------------|------|----------------|--------------------|--------------------|-------------------|-------------------|
| Methoxypropanol  | 1131 | Alcohols       | 0.00490±0.00036a   | —                  | 0.00260±0.00045b  | 0.00330±0.00029b  |
| Pentyl alcohol   | 1256 | Alcohols       | 0.00060±0.00003d   | 0.00550±0.00057b   | 0.00600±0.00008b  | —                 |
| 2-Heptanol       | 1327 | Alcohols       | 0.00310±0.00059d   | 0.00680±0.00116c   | 0.00640±0.0011cd  | 0.06240±0.00296a  |
| cis-2-Pentenol   | 1309 | Alcohols       | 0.00260±0.00004d   | 0.00510±0.00018b   | 0.00350±0.00017c  | 0.00370±0.00028c  |
| Hexanol          | 1356 | Alcohols       | 0.01190±0.00032ef  | 0.01880±0.00038c   | 0.01480±0.00075d  | 0.00950±0.00032fg |
| cis-2-Hexenol    | 1371 | Alcohols       | 0.00580±0.00026b   | 0.00320±0.00002c   | 0.00160±0.00006d  | 0.00110±0.00003e  |
| trans-2-Hexenol  | 1324 | Alcohols       | 0.00180±0.00016b   | 0.00200±0.00022b   | 0.00210±0.00048b  | 0.01840±0.00619a  |
| cis-2-Hexenol    | 1398 | Alcohols       | 0.00900±0.00039c   | 0.01760±0.00031b   | 0.01660±0.00065b  | 0.00370±0.00009e  |
| 1-Heptanol       | 1460 | Alcohols       | 0.00050±0.00004f   | 0.00110±0.00004d   | 0.00130±0.00013c  | 0.00290±0.00019a  |

|                          |      |                              |                        |                       |                        |                  |
|--------------------------|------|------------------------------|------------------------|-----------------------|------------------------|------------------|
| 2-Ethyl-1-hexanol        | 1489 | Alcohols                     | 0.01000±0.00015b       | 0.01210±0.00037a      | 0.00890±0.00060b       | 0.01280±0.00103a |
| 3-Ethyl-4-methylpentanol | 1500 | Alcohols                     | 0.00010±0.00001b       | 0.00010±0.00001b      | 0.00020±0.00003b       | 0.00090±0.00026a |
| 1-Octanol                | 1557 | Alcohols                     | 0.00070±0.00002f       | 0.00310±0.00016a      | 0.00330±0.00044d       | 0.00960±0.00042b |
| trans-2-Octenol          | 1616 | Alcohols                     | 0.00020±0.00002f       | 0.00320±0.00010a      | 0.00150±0.00019d       | 0.00260±0.00011b |
| Nonanol                  | 1654 | Alcohols                     | 0.00030±0.00007c       | 0.00110±0.00010a      | 0.00060±0.00011b       | 0.00130±0.00005a |
| 1-Dodecanol              | 1404 | Alcohols                     | 0.00030±0.00013bc      | 0.00020±0.00007c      | 0.00020±0.00007c       | 0.00080±0.00006a |
| 2-methyl-5-Hepten-1-ol   | 1730 | Alcohols                     | —                      | 0.00020±0.00037b<br>c | 0.00010±0.00001c       | 0.00160±0.00001a |
| Acetic acid              | 1449 | Acid                         | 0.00190±0.00025b       | 0.00100±0.00014b      | 0.00120±0.00037b       | 0.06710±0.00715a |
| Isobutyric acid          | 1557 | Acid                         | 0.00020±0.00006cd<br>e | —                     | 0.00050±0.00008c       | 0.00630±0.00021a |
| Butanoic acid            | 1574 | Acid                         | 0.00010±0.00005c       | 0.00010±0.00002c      | 0.00110±0.00035c       | 0.04120±0.00155a |
| Methylethylacetic acid   | 1658 | Acid                         | 0.00040±0.00029c       | 0.00020±0.00002c      | 0.00500±0.00130c       | 0.06850±0.00123b |
| Hexanoic acid            | 1762 | Acid                         | 0.00870±0.00622d       | 0.01290±0.00088d      | 0.19810±0.05991c       | 3.44940±0.17479a |
| trans-3-Hexenoic Acid    | 1909 | Acid                         | —                      | —                     | 0.00020±0.00002b       | 0.00290±0.00079a |
| Heptylic acid            | 1947 | Acid                         | 0.00010±0.00003c       | —                     | 0.00050±0.00011c       | 0.00650±0.00159a |
| trans-2-Hexenoic acid    | 1933 | Acid                         | 0.00050±0.00003c       | 0.00160±0.0001bc      | 0.00150±0.00042bc      | 0.00500±0.00139a |
| Octanoic acid            | 2052 | Acid                         | 0.00080±0.00054c       | 0.00110±0.00009c      | 0.00710±0.00168c       | 0.34080±0.07633a |
| Nonanoic acid            | 2155 | Acid                         | 0.00060±0.00014b       | 0.00040±0.00011b      | 0.00050±0.00012b       | 0.00280±0.00109a |
| trans-2-Octenoic acid    | 2182 | Acid                         | —                      | —                     | 0.00030±0.00015b       | 0.00110±0.00014a |
| Ethyl butyrate           | 1039 | Ethyl esters                 | 0.00130±0.00013b       | 0.00220±0.00038b      | 0.01000±0.00171b       | 4.42160±0.25362a |
| Ethyl 2-methylbutyrate   | 1062 | Ethyl esters                 | —                      | —                     | —                      | 0.13210±0.01056a |
| Ethyl isovalerate        | 1093 | Ethyl esters                 | —                      | —                     | 0.00110±0.00025b       | 1.08430±0.08662a |
| Ethyl pentanoate         | 1140 | Ethyl esters                 | 0.00040±0.00003b       | 0.00060±0.00003b      | 0.00100±0.00012b       | 0.03730±0.00254a |
| Ethyl hexanoate          | 899  | Ethyl esters                 | 0.00050±0.00014b       | 0.00080±0.00003b      | 0.00680±0.00190b       | 5.86450±0.43765a |
| Ethyl 2-hexenoate        | 1343 | Ethyl esters                 | —                      | —                     | —                      | 0.08150±0.00574a |
| Ethyl 3-hydroxyhexanoate | 1677 | Ethyl esters                 | —                      | —                     | —                      | 0.00420±0.00060a |
| Methyl acetate           | 848  | acetate esters               | —                      | 0.05670±0.00121e      | 0.16890±0.01664c       | 0.24010±0.00803b |
| Ethyl Acetate            | 764  | acetate esters               | 0.01590±0.00057b       | 0.01530±0.00075b      | 0.02000±0.00218b       | 3.74560±0.16729a |
| Isopentyl acetate        | 1136 | acetate esters               | —                      | —                     | 0.00610±0.00103c       | 0.06060±0.00428a |
| isopentenyl acetate      | 1249 | acetate esters               | —                      | —                     | 0.00020±0.00002c       | 0.00660±0.00037a |
| 2-Heptyl acetate         | 1380 | acetate esters               | —                      | —                     | —                      | 0.01140±0.00119a |
| Hexyl acetate            | 1299 | acetate esters               | —                      | 0.00120±0.00013d      | 0.01500±0.00450c       | 0.10420±0.01036a |
| trans-3-Hexenyl acetate  | 1306 | acetate esters               | —                      | 0.00110±0.00008b      | 0.00050±0.00012c       | 0.00310±0.00066a |
| trans-2-Hexenyl acetate  | 1337 | acetate esters               | —                      | 0.00070±0.00002e      | 0.02250±0.00542c       | 0.07020±0.00486b |
| Methyl butyrate          | 945  | other esters                 | —                      | 0.00420±0.00028d      | 0.06070±0.00970c       | 0.42760±0.02008b |
| Methyl isopentanoate     | 1019 | other esters                 | —                      | —                     | 0.01420±0.00302c       | 0.07080±0.00488a |
| Propyl isovalerate       | 1167 | other esters                 | —                      | —                     | —                      | 0.00520±0.00042a |
| Methyl hexanoate         | 1197 | other esters                 | 0.00040±0.00022d       | 0.00380±0.00008d      | 0.04810±0.01455c       | 0.52780±0.03324a |
| Butyl butylate           | 1240 | other esters                 | —                      | —                     | —                      | 0.01570±0.00172a |
| Isoamyl butylate         | 1263 | other esters                 | —                      | —                     | 0.00020±0.00005c       | 0.00710±0.00089a |
| Methyl 2-hexenoate       | 1272 | other esters                 | 0.00040±0.00001d       | 0.00080±0.00016c<br>d | 0.00150±0.00022c       | 0.01000±0.00076a |
| Hexyl butyrate           | 1417 | other esters                 | 0.00020±0.00008b       | 0.00050±0.00009b      | 0.00040±0.00012b       | 0.00110±0.00034a |
| trans-2-Hexenyl Butyrate | 1476 | other esters                 | —                      | —                     | —                      | 0.00160±0.00026a |
| Octyl isovalerate        | 1654 | other esters                 | —                      | —                     | 0.00007±0.00004b       | 0.00010±0.00006a |
| p-Xylene                 | 870  | Benzene and volatile phenols | 0.00170±0.00007e       | 0.00910±0.00049b<br>c | 0.00810±0.00235bc<br>d | 0.01880±0.00208a |
| Styrene                  | 1264 | Benzene and volatile phenols | 0.00030±0.00003c       | 0.00110±0.00006b<br>c | 0.00100±0.00013bc      | 0.00710±0.00068a |
| Benzaldehyde             | 1523 | Benzene and volatile phenols | 0.00150±0.00018c       | 0.00350±0.00021c      | 0.01130±0.00080b       | 0.13330±0.00444a |
| Clorius                  | 1590 | Benzene and volatile phenols | —                      | —                     | 0.00030±0.00003d       | 0.00130±0.00006a |
| Benzeneacetaldehyde      | 1574 | Benzene and volatile phenols | 0.00060±0.00002c       | 0.00050±0.00004c      | 0.00040±0.00003c       | 0.00440±0.00028a |
| Acetophenon              | 1652 | Benzene and volatile phenols | 0.00050±0.00003cd      | 0.00030±0.00002d      | 0.00060±0.00005bc<br>d | 0.00510±0.00027a |

|                             |      |                                     |                   |                               |                                |                                |
|-----------------------------|------|-------------------------------------|-------------------|-------------------------------|--------------------------------|--------------------------------|
| Ethyl benzoate              | 1671 | <i>Benzene and volatile phenols</i> | 0.00010±0.00002b  | —                             | —                              | 0.01450±0.00057a               |
| Benzyl acetate              | 1727 | <i>Benzene and volatile phenols</i> | 0.00010±0.00007e  | 0.00010±0.00002d <sub>e</sub> | 0.00040±0.00003c               | 0.00630±0.00024a               |
| Naphthalene                 | 1744 | <i>Benzene and volatile phenols</i> | 0.00220±0.00008e  | 0.00420±0.00052c <sub>d</sub> | 0.00390±0.00057cd <sub>e</sub> | 0.01320±0.00160a               |
| Methyl salicylate           | 1675 | <i>Benzene and volatile phenols</i> | 0.00030±0.00007e  | 0.00050±0.00001e              | 0.00210±0.00025c               | 0.01020±0.00052a               |
| 2-Methylnaphthalene         | 1839 | <i>Benzene and volatile phenols</i> | 0.00080±0.00004d  | 0.00120±0.00012c <sub>d</sub> | 0.00110±0.00013cd              | 0.00380±0.00052a               |
| Benzyl alcohol              | 1883 | <i>Benzene and volatile phenols</i> | 0.00090±0.00025bc | 0.00080±0.00002c <sub>d</sub> | 0.00140±0.00052ab              | 0.00130±0.00018ab <sub>c</sub> |
| Phenylethyl Alcohol         | 1920 | <i>Benzene and volatile phenols</i> | 0.00060±0.00015c  | 0.00030±0.00001c <sub>d</sub> | 0.00060±0.00021c               | 0.00050±0.00009cd              |
| Benzenol                    | 2012 | <i>Benzene and volatile phenols</i> | 0.00010±0.00001e  | 0.00030±0.00002c <sub>d</sub> | 0.00030±0.00006c               | 0.00080±0.00005a               |
| Ethyl cinnamate             | 2145 | <i>Benzene and volatile phenols</i> | 0.00020±0.00007b  | 0.00020±0.00003b              | 0.00100±0.00017b               | 0.10050±0.01574a               |
| Cinnamyl acetate            | 2192 | <i>Benzene and volatile phenols</i> | 0.00020±0.00006b  | —                             | —                              | 0.00080±0.00027a               |
| Eugenol                     | 2160 | <i>Benzene and volatile phenols</i> | —                 | —                             | 0.00030±0.00007b               | 0.00010±0.00005c               |
| Pentanal                    | 982  | <i>aldehydes and ketone</i>         | 0.00130±0.00002e  | 0.00910±0.00044d              | 0.01510±0.00216c               | 0.03470±0.00156a               |
| Ethyl vinyl ketone          | 1410 | <i>aldehydes and ketone</i>         | 0.00130±0.00004e  | 0.02130±0.00044d              | 0.05790±0.00531b               | 0.05350±0.00377bc              |
| Hexanal                     | 1041 | <i>aldehydes and ketone</i>         | 0.09210±0.00119e  | 0.68160±0.01742a <sub>b</sub> | 0.46200±0.08023cd              | 0.69380±0.04251a               |
| trans-2-Pentenal            | 1173 | <i>aldehydes and ketone</i>         | 0.00530±0.00018f  | 0.01340±0.00090d              | 0.01960±0.00102c               | 0.02890±0.00109a               |
| 3-Hexenal                   | 853  | <i>aldehydes and ketone</i>         | 0.00320±0.00032g  | 0.03180±0.00113a              | 0.02020±0.00148cd              | 0.00960±0.00074f               |
| Isobutyl ketone             | 1207 | <i>aldehydes and ketone</i>         | 0.00300±0.00006d  | 0.00480±0.00012b <sub>c</sub> | 0.00380±0.00038cd              | 0.00710±0.00040a               |
| Heptanal                    | 1187 | <i>aldehydes and ketone</i>         | 0.00060±0.00006e  | 0.00380±0.00020c <sub>d</sub> | 0.00450±0.00095c               | 0.01770±0.00035a               |
| trans-2-Hexenal             | 1329 | <i>aldehydes and ketone</i>         | 0.00360±0.00013f  | 0.03420±0.00038a              | 0.02060±0.00198c               | 0.01270±0.00142e               |
| 2-Hexenal                   | 1220 | <i>aldehydes and ketone</i>         | 0.21820±0.00509f  | 1.45460±0.04182a              | 0.94960±0.10100c               | 0.79340±0.037550d <sub>e</sub> |
| 3-Octanone                  | 1281 | <i>aldehydes and ketone</i>         | 0.00020±0.00005d  | 0.00100±0.00017c <sub>d</sub> | 0.00150±0.00037cd              | 0.02040±0.00139a               |
| Octanal                     | 1280 | <i>aldehydes and ketone</i>         | 0.00050±0.00009c  | 0.00120±0.00013c              | 0.00170±0.00033c               | 0.01000±0.00138a               |
| 1-Octene-3-one              | 1438 | <i>aldehydes and ketone</i>         | 0.00030±0.00002d  | 0.00500±0.00012b <sub>c</sub> | 0.00540±0.00132b               | 0.00800±0.00048a               |
| cis-2-Heptenal              | 1323 | <i>aldehydes and ketone</i>         | 0.00030±0.00001e  | 0.01350±0.00024b              | 0.01030±0.00151c               | 0.02150±0.00086a               |
| Sulcatone                   | 1333 | <i>aldehydes and ketone</i>         | 0.00040±0.00004f  | 0.00260±0.00016d              | 0.00340±0.00028c               | 0.00970±0.00059a               |
| Nonanal                     | 1386 | <i>aldehydes and ketone</i>         | 0.00030±0.00002d  | 0.00050±0.00008c <sub>d</sub> | 0.00050±0.00004cd              | 0.00130±0.00020a               |
| Sorbaldehyde                | 1411 | <i>aldehydes and ketone</i>         | 0.00280±0.00009f  | 0.01210±0.00020b              | 0.00780±0.00076d               | 0.00580±0.00021e               |
| trans-2-Octenal             | 1428 | <i>aldehydes and ketone</i>         | 0.00030±0.00003d  | 0.00530±0.00022c              | 0.00640±0.00136c               | 0.03540±0.00236a               |
| trans-2-trans-4-Heptadienal | 1494 | <i>aldehydes and ketone</i>         | 0.00050±0.00002g  | 0.01520±0.00033a              | 0.00920±0.00058d               | 0.00940±0.00034d               |
| Decanal                     | 1504 | <i>aldehydes and ketone</i>         | 0.00040±0.00004c  | 0.00050±0.00023c              | 0.00050±0.00014c               | 0.00170±0.00030a               |



|                             |      |                      |                        |                       |                   |                   |
|-----------------------------|------|----------------------|------------------------|-----------------------|-------------------|-------------------|
| Camphor                     | 1516 | aldehydes and ketone | 0.00020±0.00001g       | 0.00100±0.00004c      | 0.00070±0.00007d  | 0.00110±0.00004b  |
| trans-2-Nonenal             | 1679 | aldehydes and ketone | 0.00010±0.00002e       | 0.00140±0.00012c      | 0.00120±0.00036cd | 0.01220±0.00091a  |
| Cucumber aldehyde           | 1589 | aldehydes and ketone | 0.00010±0.00002e       | 0.00420±0.00023b      | 0.00280±0.00061c  | 0.01310±0.00095a  |
| trans-2-Decenal             | 1206 | aldehydes and ketone | 0.00020±0.00001d       | 0.00050±0.00004b<br>c | 0.00050±0.00006cd | 0.00230±0.00029a  |
| trans, trans-2,4-Nonadienal | 1703 | aldehydes and ketone | —                      | 0.00110±0.00011b<br>c | 0.00090±0.00009cd | 0.00450±0.00026a  |
| 1-Pentene-3-ol              | 1162 | Isoprenoids          | 0.00370±0.00020e       | 0.01080±0.00005a      | 0.00590±0.00091d  | 0.00700±0.00036cd |
| β-Myrcene                   | 1170 | Isoprenoids          | —                      | —                     | —                 | —                 |
| D-Limonene                  | 1203 | Isoprenoids          | —                      | —                     | 0.00070±0.00008c  | 0.00590±0.00013a  |
| β-Ocimene                   | 1246 | Isoprenoids          | —                      | —                     | 0.00040±0.00006c  | 0.00550±0.00012a  |
| Dihydrolinalool             | 1255 | Isoprenoids          | 0.00150±0.00046cd<br>e | 0.00170±0.00036c<br>d | 0.00120±0.00008de | 0.00500±0.00032a  |
| cis-Linalool oxide          | 1441 | Isoprenoids          | —                      | 0.00020±0.00002e      | 0.00050±0.00005d  | 0.00130±0.00006a  |
| Morillol                    | 1452 | Isoprenoids          | 0.00490±0.00017f       | 0.04400±0.00131a      | 0.02250±0.00254d  | 0.03880±0.00100b  |
| trans-Linalool oxide        | 1464 | Isoprenoids          | —                      | 0.00070±0.00003d      | 0.00150±0.00023c  | 0.00400±0.00013a  |
| Linalol                     | 1527 | Isoprenoids          | 0.00060±0.00006e       | 0.00450±0.00036e      | 0.03630±0.00550c  | 0.52800±0.00819a  |
| Levomenthol                 | 1651 | Isoprenoids          | 0.00070±0.00018d       | 0.00090±0.00018c<br>d | 0.00070±0.00006d  | 0.00260±0.00012a  |
| Farnesene                   | 1749 | Isoprenoids          | —                      | —                     | 0.00020±0.00006c  | 0.00640±0.00006a  |
| α-Terpineol                 | 1697 | Isoprenoids          | 0.00010±0.00001c       | 0.00030±0.00005c      | 0.00100±0.00007c  | 0.01440±0.00155a  |
| Bisabolene                  | 1792 | Isoprenoids          | —                      | —                     | —                 | 0.00100±0.00013a  |
| Nerylacetone                | 1865 | Isoprenoids          | 0.0001±0.00004bc       | 0.0003±0.00003bc      | 0.00040±0.00007b  | 0.00200±0.00039a  |
| Bisabolol                   | 2207 | Isoprenoids          | —                      | —                     | —                 | 0.00180±0.00063a  |
| β-Damascenone               | 1808 | Isoprenoids          | 0.00030±0.00005b       | 0.00710±0.00057a      | 0.00470±0.00036a  | 0.00610±0.00054a  |
| Nerolidol                   | 1961 | Isoprenoids          | —                      | —                     | 0.00100±0.00029b  | 0.14740±0.01521a  |
| 1-p-Menthen-9-al            | 1212 | Isoprenoids          | 0.0000±0.00001e        | 0.00070±0.00005d      | 0.00120±0.00004c  | 0.00580±0.00031a  |
| 2-Pentylfuran               | 1231 | furan                | 0.00040±0.00002c       | 0.00650±0.00100b<br>c | 0.00460±0.00073bc | 0.06460±0.00455a  |
| Furfural                    | 1472 | furan                | 0.00140±0.00008c       | 0.0002±0.00001e       | 0.0002±0.00002e   | 0.00070±0.00006d  |

Note: different letters represent comparison of the same volatile components in four periods of 'Benihoppe' (WT, Table S2) and somaclonal mutant 'Xiaobai' (*mut*, Table S3)

**Table S4.** The proportion of nine categories of volatile compounds in four developmental stages of fruit between 'Benihoppe' (WT) and somaclonal mutant 'Xiaobai' (*mut*).

|                              | WT-Green | WT-White | WT-Turn | WT-Red | mut-Green | mut-White | mut-Turn | mut-Red |
|------------------------------|----------|----------|---------|--------|-----------|-----------|----------|---------|
| Alcohols                     | 8.21%    | 3.34%    | 2.38%   | 2.33%  | 11.67%    | 3.07%     | 2.92%    | 0.56%   |
| Acid                         | 0.97%    | 0.44%    | 2.43%   | 26.18% | 2.97%     | 0.66%     | 9.06%    | 16.61%  |
| esters                       | 0.85%    | 1.44%    | 8.20%   | 32.24% | 4.31%     | 3.38%     | 15.82%   | 70.45%  |
| Benzene and volatile phenols | 1.17%    | 1.05%    | 1.00%   | 1.05%  | 2.27%     | 0.85%     | 1.37%    | 1.34%   |
| aldehydes and ketone         | 87.01%   | 90.60%   | 82.86%  | 33.74% | 75.67%    | 89.04%    | 67.34%   | 7.52%   |
| Isoprenoids                  | 1.50%    | 2.68%    | 2.79%   | 4.23%  | 2.71%     | 2.73%     | 3.28%    | 3.26%   |
| furan                        | 0.30%    | 0.44%    | 0.34%   | 0.21%  | 0.41%     | 0.26%     | 0.20%    | 0.27%   |

(The esters in Table S4 included the ethyl esters, acetates, and other esters)

**Table S5.** The ratio of volatile substances contents in ‘Benihoppe’ (WT) and somaclonal mutant ‘Xiaobai’ (*mut*) in four developmental stages.

|                              | Green<br>mut/WT | White<br>mut/WT | Turn<br>mut/WT | Red<br>mut/WT |
|------------------------------|-----------------|-----------------|----------------|---------------|
| Alcohols                     | 0.25            | 1.83            | 1.10           | 1.12          |
| Acid                         | 0.54            | 2.98            | 3.33           | 2.96          |
| Ethyl esters                 | 0.57            | 2.40            | 3.55           | 56.57         |
| acetate esters               | 1.05            | 4.75            | 1.24           | 7.29          |
| other esters                 | 0.38            | 5.81            | 4.99           | 1.23          |
| Benzene and volatile phenols | 0.34            | 1.59            | 1.23           | 5.93          |
| aldehydes and ketone         | 0.15            | 1.96            | 0.73           | 1.04          |
| Isoprenoids                  | 0.32            | 2.03            | 1.05           | 3.60          |
| furan                        | 0.24            | 1.18            | 0.52           | 5.99          |

**Table S6.** The unique volatile components in ‘Benihoppe’ (WT).

| Period | The volatile components         | classification       |
|--------|---------------------------------|----------------------|
| Green  | Methyl acetate                  | acetate esters       |
|        | Hexyl acetate                   | acetate esters       |
|        | trans-2-Hexenyl acetate         | acetate esters       |
|        | trans, trans-2,4-Nonadienal     | aldehydes and ketone |
|        | cis-Linalol oxide               | Isoprenoids          |
|        | trans-Linalool oxide (furanoid) | Isoprenoids          |
| White  | Farnesene                       | Isoprenoids          |
|        | Methoxypropanol                 | Alcohols             |
|        | Isobutyric acid                 | Acid                 |
|        | Heptylic acid                   | Acid                 |
| Turn   | trans-2-Hexenyl Butyrate        | other esters         |
| Red    | Pentyl alcohol                  | Alcohols             |

**Table S7.** The unique volatile components in somaclonal mutant ‘Xiaobai’ (*mut*).

| Period | The aroma components   | classification               |
|--------|------------------------|------------------------------|
| Green  | 2-methyl-5-Hepten-1-ol | Alcohols                     |
|        | Ethyl pentanoate       | Ethyl esters                 |
|        | Ethyl benzoate         | Benzene and volatile phenols |
|        | Benzyl acetate         | Benzene and volatile phenols |
|        | Cinnamyl acetate       | Benzene and volatile phenols |
|        | Nerylacetone           | Isoprenoids                  |
| White  | 2-methyl-5-Hepten-1-ol | Alcohols                     |
|        | Ethyl pentanoate       | Ethyl esters                 |
|        | Methyl butyrate        | other esters                 |
|        | Benzyl acetate         | Benzene and volatile phenols |
| Turn   | Methoxypropanol        | Alcohols                     |
|        | 2-methyl-5-Hepten-1-ol | Alcohols                     |
|        | trans-3-Hexenoic Acid  | Acid                         |
|        | trans-2-Octenoic acid  | Acid                         |
|        | Ethyl isovalerate      | Ethyl esters                 |
|        | Ethyl pentanoate       | Ethyl esters                 |
|        | isopentenyl acetate    | acetate esters               |
|        | Isoamyl butylate       | other esters                 |
|        | Octyl isovalerate      | other esters                 |
|        | Benzeneacetaldehyde    | Benzene and volatile phenols |
|        | Eugenol                | Benzene and volatile phenols |
|        | Farnesene              | Isoprenoids                  |
| Red    | Nerolidol              | Isoprenoids                  |
|        | Methoxypropanol        | Alcohols                     |

|                          |                                     |
|--------------------------|-------------------------------------|
| trans-2-Octenoic acid    | <i>Acid</i>                         |
| Ethyl 2-hexenoate        | <i>Ethyl esters</i>                 |
| Ethyl 3-hydroxyhexanoate | <i>Ethyl esters</i>                 |
| Propyl isovalerate       | <i>other esters</i>                 |
| Octyl isovalerate        | <i>other esters</i>                 |
| Benzeneacet aldehyde     | <i>Benzene and volatile phenols</i> |
| Ethyl benzoate           | <i>Benzene and volatile phenols</i> |
| Cinnamyl acetate         | <i>Benzene and volatile phenols</i> |
| Bisabolene               | <i>Isoprenoids</i>                  |
| Nerylacetone             | <i>Isoprenoids</i>                  |
| Bisabolol                | <i>Isoprenoids</i>                  |

**Table S8.** Principal component load matrix of volatile compounds.

| <b>Categories</b>            | <b>PC1</b> | <b>PC2</b>  |
|------------------------------|------------|-------------|
| Alcohols                     | 0.14890665 | -0.65112885 |
| Acid                         | 0.37975818 | 0.06789272  |
| Ethyl esters                 | 0.37326131 | 0.09826685  |
| Acetate esters               | 0.38004148 | 0.08590762  |
| Other esters                 | 0.33377753 | 0.02145567  |
| Benzene and volatile phenols | 0.38012223 | 0.04543039  |
| Aldehydes and ketone         | 0.06851612 | -0.74088228 |
| Isoprenoids                  | 0.38290603 | 0.04746335  |
| Furan                        | 0.37768129 | 0.02649001  |
